# Supplementary material for: Polyethyleneimine-assisted synthesis of high-quality platinum/graphene hybrids: the effect of molecular weight on electrochemical properties
Source: Royal Society of Chemistry journal article supplement (doi:10.1039/c5ta02046h), 2015-01-01
Supplement: c5ta02046h1.pdf [file c5ta02046h1.pdf]

## Electronic Supplementary Information

# Polyethyleneimine-assisted synthesis of high-quality platinum/graphene hybrids: The effect of molecular weight on electrochemical property

Xueqing Gao,<sup>‡a</sup> Yumei Li,<sup>‡a</sup> Qi Zhang,<sup>a</sup> Shuni Li,<sup>a</sup> Yu Chen,<sup>\*a</sup> and Jong-Min Lee,<sup>\*b</sup>

*<sup>a</sup> School of Materials Science and Engineering, School of Chemistry and Chemical Engineering, Shaanxi Normal University, Xi'an, Shaanxi, 710062, P. R. China*

*E-mail: ndchenyu@gmail.com*

*<sup>b</sup> School of Chemical and Biomedical Engineering Nanyang Technological University, Singapore 637459, Singapore*

*E-mail: jmlee@ntu.edu.sg*

<sup>‡</sup> These two authors made an equal contribution to this work.

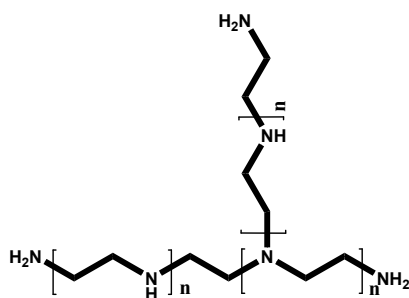

**Scheme S1.** The molecular structure of PEI.

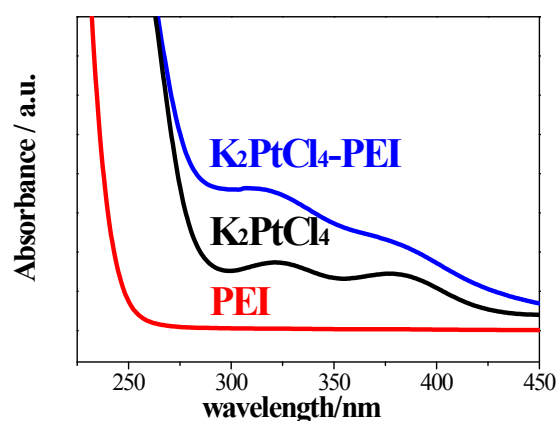

**Fig. S1** UV-vis absorption spectra of (a) PEI solution (pH 10.5), (b)  $\text{K}_2\text{PtCl}_4$  solution (pH 10.5), and (c) the mixture solution of PEI and  $\text{K}_2\text{PtCl}_4$  (pH 10.5, molar ratio of PEI monomer to  $\text{K}_2\text{PtCl}_4$  is 10:1).

The UV-vis absorption spectroscopic measurements confirm the interaction between PEI and PEI  $\text{K}_2\text{PtCl}_4$ . Upon addition of the PEI solution (pH 10.5) to the  $\text{K}_2\text{PtCl}_4$  solution (pH 10.5), the characteristic absorption peaks at 320 and 377 nm for the  $\text{K}_2\text{PtCl}_4$  species exhibit a blue-shift, demonstrating that PEI interacts with  $\text{K}_2\text{PtCl}_4$  via coordination interactions, and generates the PEI- $\text{Pt}^{\text{II}}$  complex. Since  $\text{Pt}^{\text{II}}$  species generally generate the  $[\text{Pt}^{\text{II}}(\text{NH}_3)_4]^{2-}$ -like structure four coordination compounds, the obtained PEI- $\text{Pt}^{\text{II}}$  complex under the present experimental conditions contains the uncoordinated  $-\text{NH}_2$  groups due to high molar ratio of PEI monomer to  $\text{K}_2\text{PtCl}_4$  (10:1).

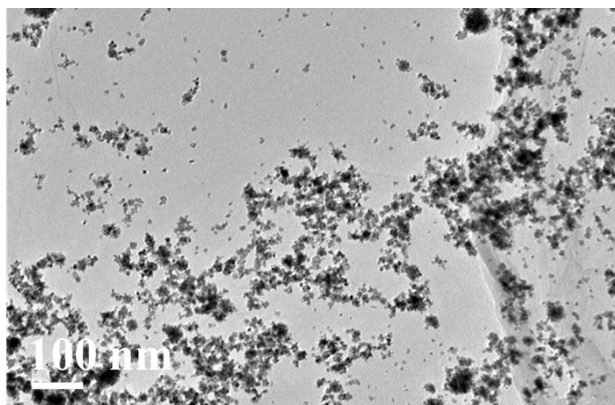

**Fig. S2** TEM image of Pt/RGO hybrids that synthesized in the absence of PEI

**Preparation of the Pt/RGO hybrid without PEI:** 0.8 mL of 0.05 M  $K_2PtCl_4$  and 40 mL of homogeneous GO suspension ( $0.25 \text{ mg mL}^{-1}$ ) stirred for 30 min. Subsequently, 10 mL of 0.125 M  $NaBH_4$  solution was slowly added into the mixture with stirring for 2 h. Finally, the Pt/RGO hybrid was collected by centrifugation at 1200 rpm for 15 min, washed eight times with water.

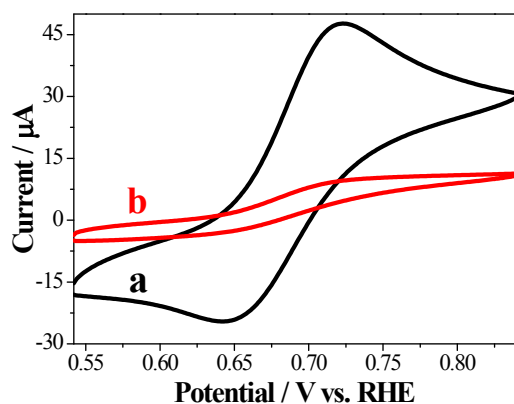

**Fig. S3** Cyclic voltammograms of (a) the RGO-600 and (b) RGO-10000 hybrids in  $N_2$ -saturated 0.5 M  $H_2SO_4$  solution containing 0.5 mM hydroquinone at a scan rate of  $50 \text{ mV s}^{-1}$ .

**Preparation of the RGO-600 and RGO-10000 hybrids:** Firstly, 0.8 mL of 0.5 M PEI solutions and 40 mL of homogeneous GO suspension ( $0.25 \text{ mg mL}^{-1}$ ) were mixed and stirred for 30 min. Then, 10 mL of 0.125 M  $NaBH_4$  solution was slowly added into the mixture with stirring for 2 h. Finally, the RGO-PEI hybrids were collected by

centrifugation at 1200 rpm for 15 min, washed eight times with water, and then dried at 40 °C for 24 h in a vacuum dryer. When low molecular weight PEI (Mw 600) and high molecular weight PEI (Mw 10000) were used as reaction precursors, the resultant RGO hybrids were named as the RGO-600 and RGO-10000 hybrids, respectively.

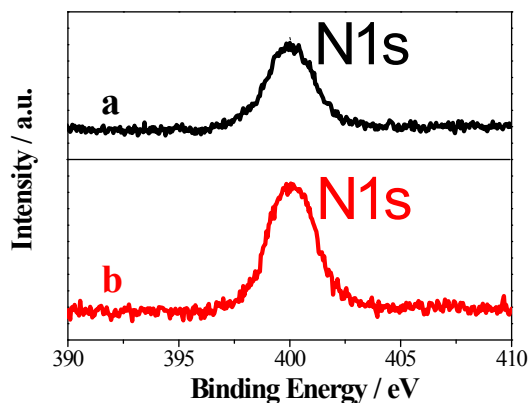

**Fig. S4** N1s XPS spectra of the (a) Pt/RGO-600 and (b) Pt/RGO-10000 hybrids.

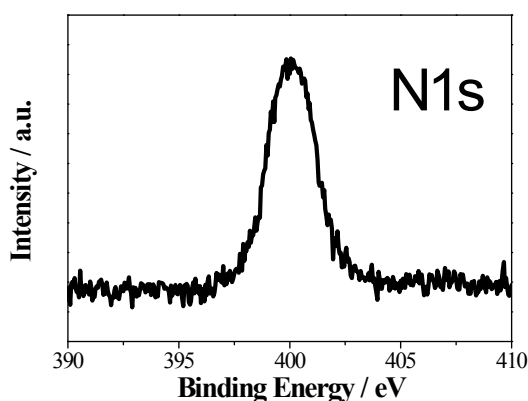

**Fig. S5** N1s XPS spectrum of the obtained Pt-600 nanoparticles in the absence of GO.

**Preparation of the Pt-600 nanoparticles:** 0.8 mL of 0.05 M  $K_2PtCl_4$  and 0.8 mL of 0.5 M PEI (Mw 600) solutions were added into 5 mL water with stirring for 30 min. Subsequently, 10 mL of 0.125 M  $NaBH_4$  solution was slowly added into the mixture with stirring for 2 h. Finally, the Pt-600 nanoparticles was collected by centrifugation at 1200 rpm for 15 min, washed eight times with water, and then dried at 40 °C for 24 h in a vacuum dryer.
